# Supplementary material
Source: Research Square preprint supplement (doi:10.21203/rs.3.rs-8981216/v1)
Supplement: Supplementary file 1 [file cafd7ec87e01c1f13798aebd.docx]

**Supplementary table S1:** Primers used throughout this study. The [Populus tremula x Populus alba HAP1 v5.1](https://phytozome-next.jgi.doe.gov/info/PtremulaxPopulusalbaHAP1_v5_1) genome on Phytozome was used to obtain the poplar TPS16 gene sequence. For Laccaria bicolor genes, including HK genes, the Laccaria bicolor V2.0 genome on mycocosm was used.

| Gene target | Protein ID # | Primer sequence (5’ 🡪 3’) |
| --- | --- | --- |
| *TPS16* | PtXaTreH.01G253600.1 | **FW :** CCAACTTGCTCCATTCCCTA  **RV :** TGCTTTGATCACGAGTTTCG |
| *GH28a*  (Zhang et al., 2021) | 613299 | **FW :** GCAAAGCAGGTTGCGGTAAA  **RV :** CAGTATGTTCGCGTTGCTGG |
| *MiSSP7* | 298595 | **FW :** TCTCGCCTGCACTATCCTCT  **RV :** TTGGGCTCCGGTACTCTTCT |
| *MiSSP17* | 332226 | **FW :** ACCGCCAATGGATGTGCATA  **RV :** CGGTGCAGTGTTGTGTCAAG |
| *Catalase* | 123238 | **FW :** TCAAAACCCAGAGTCGATCC  **RV :** CACAAAGGAACCGTCATCCT |
| *Mn/Fe SOD1* | 635077 | **FW :** ATTCGTTGTTGAGGGAGTGG  **RV :** CGCACATATCAGCGAAAGAA |
| *Mn/Fe SOD2* | 192586 | **FW :** AGGCAATTGAGCGTGACTTT  **RV :** AAGGATCCTGGTTTGCAGTG |
| *Mn/Fe SOD3* | 291347 | **FW :** GGCCACATCAACCACTCTCT  **RV :** GTTATCGAGGCTACCGAACG |
| *Mn/Fe SOD4* | 295682 | **FW :** CCAGGACCCACTTCTCCATA  **RV :** TCAAAGTTGATGACGGACCA |
| *Mn/Fe SOD5* | 312019 | **FW :** CAGTTTGAAGCCAACAAGCA  **RV :** CCAGAACTGCCTCAACCATT |
| *HK gene 1*  (Pellegrin et al., 2019) | 611151 | **FW :** TGGTTTTGCGGCGTTCTTCT  **RV :** TATGTCGTGCCCTGTCCCAA |
| *HK gene 2*  (Pellegrin et al., 2019) | 313997 | **FW :** GAGCAGAGCGGGTACGAATG  **RV :** ACCCGGCCGTACTGGAATAA |

**Supplementary table S2:** ANOVA output for L. bicolor S238N X P. tremula x alba 717-1B4 symbiosis marker gene expression and L. bicolor S238N antioxidant response gene expression. Expression was measured in presence or absence of a host plant under control and sublethal Cd (1 µM 3CdSO4.8H2O) growth conditions.

|  | **Cd x Host** |  | **Cd** |  | **Host** |  | |
| --- | --- | --- | --- | --- | --- | --- | --- |
| *GH28a* | F (1, 12) =14.68 | P=0.0024 | F (1, 12) =20.38 | P=0.0007 | F (1, 12) =10.79 | P=0.0065 |
| *MiSSP7* | F (1, 10) =6.198 | P=0.0320 | F (1, 10) =7.769 | P=0.0192 | F (1, 10) =4.184 | P=0.0680 |
| *MiSSP17* | F (1, 9) =7.855 | P=0.0206 | F (1, 9) =6.057 | P=0.0361 | F (1, 9) =52.45 | P<0.0001 |
| *CAT*  *Mn/Fe SOD1*  *Mn/Fe SOD2*  *Mn/Fe SOD3*  *Mn/Fe SOD4*  *Mn/Fe SOD5* | F (1, 12) =14.93  F (1, 14) =3.690  F (1, 14) =0.07289  F (1, 12) =11.02  F (1, 11) =5.807  F (1, 12) =13.96 | P=0.0023  P=0.0753  P=0.7911  P=0.0061  P=0.0346  P=0.0028 | F (1, 12) =35.24  F (1, 14) =1.128  F (1, 14) =2.787  F (1, 12) =28.33  F (1, 11) =24.15  F (1, 12) =2.697 | P<0.0001  P=0.3062  P=0.1172  P=0.0002  P=0.0005  P=0.1264 | F (1, 12) =19.55  F (1, 14) =0.6774  F (1, 14) =0.09062  F (1, 12) =19.65  F (1, 11) =1.288  F (1, 12) =3.279 | P=0.0008  P=0.4243  P=0.7678  P=0.0008  P=0.2805  P=0.0953 |


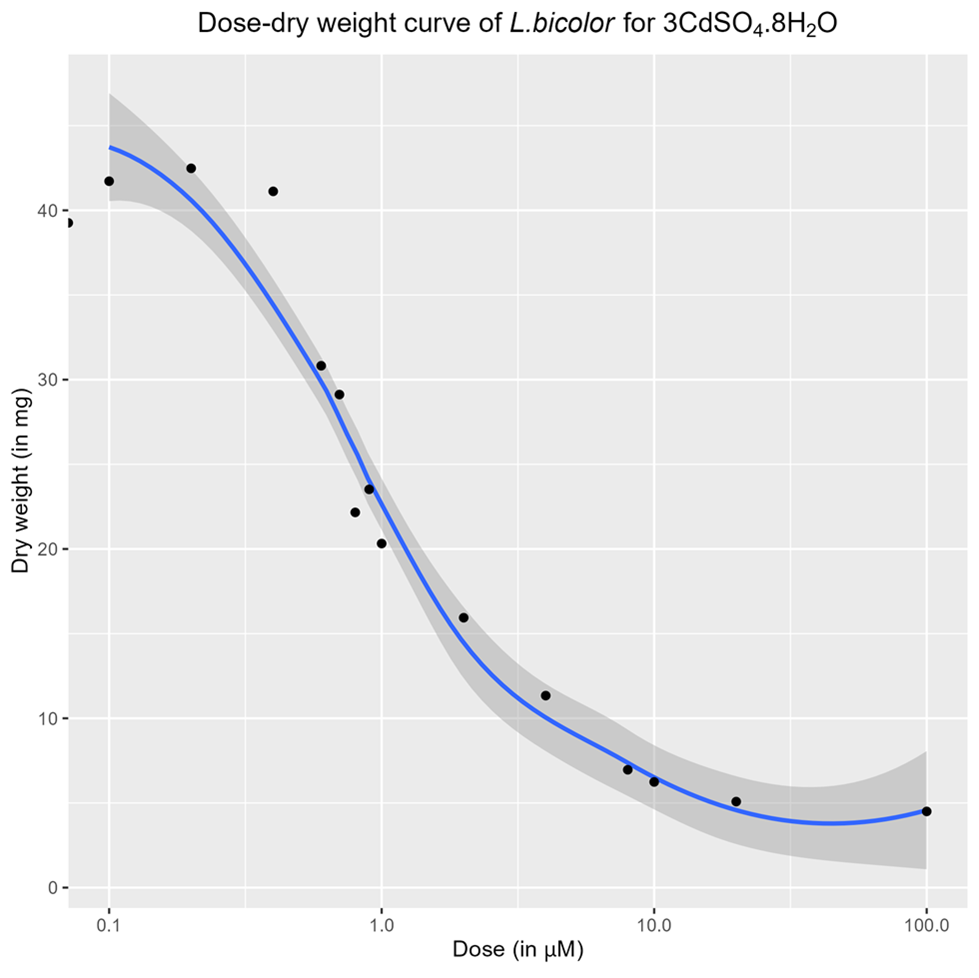


**Supplementary Fig. S1:** Dose-Response hermetic curve of L. bicolor S238N for 3CdSO4.8H2O. Free-living mycelium was cultured on P5 medium supplemented with 15 different 3CdSO4.8H2O concentrations between 0 (control) and 100 µM (n = 5). Mycelium was harvested and lyophilised after three weeks of incubation at 23°C. Using the dry weights, the 3CdSO4.8H2O EC50 value for L. bicolor S238N was calculated in R using the drc package.

Pellegrin, C., Daguerre, Y., Ruytinx, J., Guinet, F., Kemppainen, M., Frey, N. F. D., Puech-Pages, V., Hecker, A., Pardo, A. G., Martin, F. M., & Veneault-Fourrey, C. (2019). Laccaria bicolor MiSSP8 is a small-secreted protein decisive for the establishment of the ectomycorrhizal symbiosis. *Environ Microbiol*, *21*(10), 3765-3779. <https://doi.org/10.1111/1462-2920.14727>

Zhang, F., Labourel, A., Haon, M., Kemppainen, M., Da Silva Machado, E., Brouilly, N., Veneault-Fourrey, C., Kohler, A., Rosso, M. N., Pardo, A., Henrissat, B., Berrin, J. G., & Martin, F. (2021). The ectomycorrhizal basidiomycete Laccaria bicolor releases a GH28 polygalacturonase that plays a key role in symbiosis establishment. *New Phytol*, *233*(6), 2534-2547. <https://doi.org/10.1111/nph.17940>
